# Supplementary material for: Chronic diseases and multimorbidity among unemployed and employed persons in the Netherlands: a register-based cross-sectional study
Source: PubMed Central journal article supplement (PMC7333868; doi:10.1136/bmjopen-2019-035037), 2020-07-02

**Supplementary Table 1.** Description of ATC-codes used to identify chronic diseases among unemployed (n=507,583) and employed (n=4,566,644) persons.

| Chronic disease                                | ATC-code   | Medication class                                           | Prevalence (%)<br>Unemployed | Prevalence (%)<br>Employed |
|------------------------------------------------|------------|------------------------------------------------------------|------------------------------|----------------------------|
| <b>Cardiovascular disease</b>                  | B01A       | Antithrombotic agents                                      | 8.5                          | 3.2                        |
|                                                | C01        | Cardiac agents                                             | 1.9                          | 0.7                        |
|                                                | C03A       | Low-ceiling drugs                                          | 3.8                          | 1.5                        |
|                                                | C08        | Calcium channel blockers                                   | 5.4                          | 1.9                        |
|                                                | C07        | Beta blocking agents                                       | 9.6                          | 3.7                        |
|                                                | C09A, C09B | ACE inhibitors                                             | 7.0                          | 2.8                        |
| <b>Psychological disorders</b>                 | N05B       | Anxiolytics                                                | 6.0                          | 0.9                        |
|                                                | N05C       | Hypnotics and sedatives                                    | 3.4                          | 0.4                        |
|                                                | N06A       | Antidepressants                                            | 14.4                         | 5.0                        |
| <b>Inflammatory and antirheumatic products</b> | M01A       | Anti-inflammatory and antirheumatic products, non-steroids | 24.5                         | 15.8                       |
| <b>Respiratory diseases</b>                    | R03A, R03C | Adrenergics (inhalants)                                    | 10.5                         | 5.8                        |
|                                                | R03B, R03D | Other drugs for obstructive airway diseases                | 4.8                          | 2.3                        |
| <b>Psychotic illness</b>                       | N05A       | Antipsychotics                                             | 6.2                          | 0.8                        |
| <b>Diabetes mellitus</b>                       | A10A       | Insulins and analogues                                     | 2.5                          | 0.8                        |
|                                                | A10B       | Blood glucose lowering drugs                               | 6.4                          | 1.5                        |

**Supplementary Table 2.** Combinations and prevalence of multimorbidity of four chronic diseases among unemployed (n=507,583) and employed (n=4,566,644) persons.

| Combination | Chronic disease               |                              |                              |                           | Prevalence       |                |
|-------------|-------------------------------|------------------------------|------------------------------|---------------------------|------------------|----------------|
|             | Cardiovascular diseases (CVD) | Psychological disorders (PD) | Inflammatory conditions (IC) | Respiratory diseases (RD) | N (%) Unemployed | N (%) Employed |
| 1           | 1                             | 0                            | 0                            | 0                         | 49,124 (9.7)     | 248,948 (5.5)  |
| 2           | 0                             | 1                            | 0                            | 0                         | 38,549 (7.6)     | 137,314 (3.0)  |
| 3           | 0                             | 0                            | 1                            | 0                         | 64,535 (12.7)    | 524,452 (11.5) |
| 4           | 0                             | 0                            | 0                            | 1                         | 19,832 (3.9)     | 181,148 (4.0)  |
| 5           | 1                             | 0                            | 0                            | 1                         | 8,611 (1.7)      | 28,834 (0.6)   |
| 6           | 1                             | 0                            | 1                            | 0                         | 15,533 (3.1)     | 72,591 (1.6)   |
| 7           | 1                             | 1                            | 0                            | 0                         | 12,046 (2.4)     | 25,049 (0.5)   |
| 8           | 0                             | 1                            | 1                            | 0                         | 18,098 (3.6)     | 45,499 (1.0)   |
| 9           | 0                             | 0                            | 1                            | 1                         | 9,124 (1.8)      | 46,741 (1.0)   |
| 10          | 0                             | 1                            | 0                            | 1                         | 6,699 (1.3)      | 14,651 (0.3)   |
| 11          | 1                             | 1                            | 1                            | 0                         | 5,995 (1.2)      | 11,376 (0.2)   |
| 12          | 0                             | 1                            | 1                            | 1                         | 4,683 (0.9)      | 7,041 (0.2)    |
| 13          | 1                             | 1                            | 0                            | 1                         | 4,165 (0.8)      | 4,798 (0.1)    |
| 14          | 1                             | 0                            | 1                            | 1                         | 3,722 (0.7)      | 10,812 (0.2)   |
| 15          | 1                             | 1                            | 1                            | 1                         | 2,721 (0.5)      | 2,792 (0.1)    |

**Supplementary Table 3.** The association of employment status with multimorbidity stratified by age.

|                                        | Chronic diseases |                  |                  |
|----------------------------------------|------------------|------------------|------------------|
|                                        | 1                | 2                | ≥3               |
|                                        | OR ( 95% CI)     |                  |                  |
| <i>Employment status (n=5,074,227)</i> |                  |                  |                  |
| Employed                               | 1                | 1                | 1                |
| Unemployed                             | 1.30 (1.29-1.31) | 1.74 (1.73-1.76) | 2.59 (2.56-2.61) |
| <i>Age 18-30 (n=1,278,018)</i>         |                  |                  |                  |
| Employed                               | 1                | 1                | 1                |
| Unemployed                             | 1.65 (1.61-1.69) | 2.84 (2.75-2.93) | 5.20 (4.99-5.42) |
| <i>Age 30-45 (n=1,965,512)</i>         |                  |                  |                  |
| Employed                               | 1                | 1                | 1                |
| Unemployed                             | 1.41 (1.39-1.43) | 2.12 (2.09-2.16) | 3.52 (3.45-3.59) |
| <i>Age 45-55 (n=1,180,955)</i>         |                  |                  |                  |
| Employed                               | 1                | 1                | 1                |
| Unemployed                             | 1.22 (1.20-1.23) | 1.64 (1.61-1.67) | 2.66 (2.62-2.70) |
| <i>Age 55-65 (n=649,742)</i>           |                  |                  |                  |
| Employed                               | 1                | 1                | 1                |
| Unemployed                             | 1.09 (1.07-1.11) | 1.29 (1.26-1.31) | 1.78 (1.76-1.81) |

Logistic regression analyses were adjusted for sex, educational level and migration background.

**Supplementary Figure 1.** Prevalence of medicines for psychological disorders (a and b) and cardiovascular diseases (c and d) by age among unemployed (n=507,583) and employed (n=4,566,644) persons in 2016.

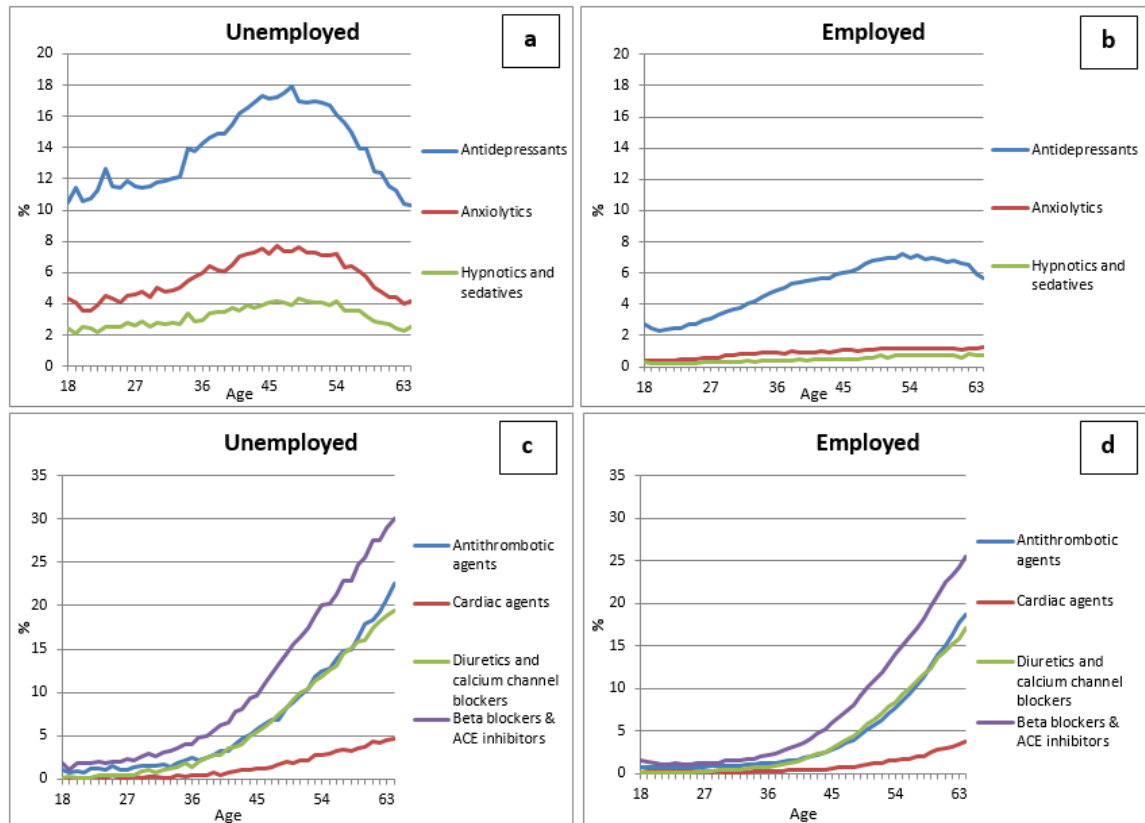

Supplement: bmjopen-2019-035037supp001.pdf [file bmjopen-2019-035037supp001.pdf]
